# Supplementary material for: Fluoride anion binding by cyclic boronic esters: influence of backbone chelate on receptor integrity
Source: Royal Society of Chemistry journal article supplement (doi:10.1039/b605031j), 2006-01-01
Supplement: b605031j.pdf [file b605031j.pdf]

## Fluoride anion binding by cyclic boronic esters: influence of backbone chelate on receptor integrity

Christopher Bresner, Joanna K. Day, Natalie D. Coombs, Ian A. Fallis, Simon Aldridge,  
Simon J. Coles, and Michael B. Hursthouse.

### Supporting Information

|    |                                                                                                                                                                                 |    |
|----|---------------------------------------------------------------------------------------------------------------------------------------------------------------------------------|----|
| 1. | WinEQNMR fit of $^1\text{H}$ NMR titration data and determination of K for <b>4</b>                                                                                             | 2  |
| 2. | ES(-) mass spectra for $[\mathbf{4}\cdot\text{F}]^-$                                                                                                                            | 4  |
| 3. | Cyclic voltametry traces for $(\text{FcB})_2\text{calix}$ ( <b>6</b> ) with/without fluoride                                                                                    | 6  |
| 4. | $^1\text{H}$ NMR spectra for the reaction of $(\text{PhB})_2\text{calix}$ ( <b>8</b> ) with $[\text{}^n\text{Bu}_4\text{N}]\text{F}\cdot x\text{H}_2\text{O}$<br>and with water | 8  |
| 5. | Crystallographic data for $\text{FcBO}_2\text{C}_2\text{H}_4$ ( <b>3a</b> )                                                                                                     | 10 |
| 6. | Crystallographic data for $\text{fc}(\text{BO}_2\text{C}_2\text{H}_4)_2$ ( <b>3b</b> )                                                                                          | 11 |
| 7. | Crystallographic data for $\text{fcB}_2\text{calix}$ ( <b>7</b> )                                                                                                               | 12 |

1. WinEQNMR fit of  $^1\text{H}$  NMR titration data and determination of K for  $\text{FcBO}_2\text{C}_2\text{H}_2\text{Ph}_2$  (4)

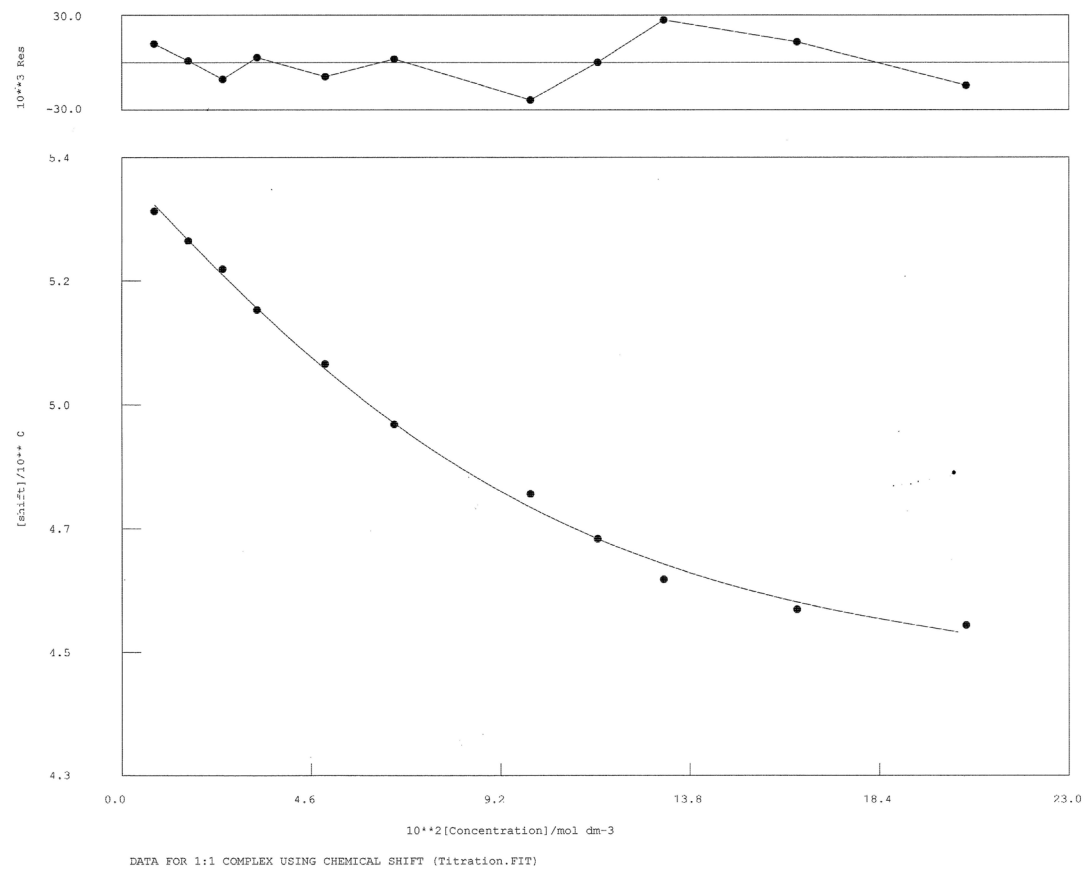

Calculations by WinEQNMR Version 1.20 by Michael J. Hynes  
 Program run at 13:44:34 on 03/09/2006

DATA FOR 1:1 COMPLEX USING CHEMICAL SHIFT (Titration.FIT)  
 Reaction: FcB(OR)2 + F- = [FcB(OR)2F]-  
 FILE: titration.FIT  
 IDEAL DATA: K1 = 30; DELTA FcB(OR)2 = 5.32; DELTA complex = 4.35  
 File prepared by S. Aldridge, February 01 2006

| NO. | A | PARAMETER   | DELTA     | ERROR     | CONDITION | DESCRIPTION    |
|-----|---|-------------|-----------|-----------|-----------|----------------|
| 1   | 1 | 3.57930E+01 | 1.000E+00 | 9.817E+00 | 4.399E+01 | K1             |
| 2   | 1 | 5.37827E+00 | 5.000E-02 | 1.044E-02 | 1.761E+00 | SHIFT FcB(OR)2 |
| 3   | 1 | 4.36904E+00 | 5.000E-02 | 5.889E-02 | 4.049E+01 | SHIFT complex  |

ORMS ERROR = 1.59E-02 MAX ERROR = 2.69E-02 AT OBS.NO. 9  
 RESIDUALS SQUARED = 2.02E-03  
 RFACTOR = 0.2746 PERCENT

| NO.         | A | EXPT. DEL  | CALC. DEL  | RESIDUAL    | % DEV       | WEIGHT     | Fluoride   |
|-------------|---|------------|------------|-------------|-------------|------------|------------|
| FcB(OR)2 pH |   |            |            |             |             |            |            |
| 1           | 1 | 5.3041E+00 | 5.3158E+00 | -1.1693E-02 | -2.2046E-01 | 1.0000E+00 | 7.8700E-03 |
| 9.7664E-02  |   | 0.0000E+00 |            |             |             |            |            |
| 2           | 1 | 5.2514E+00 | 5.2524E+00 | -1.0300E-03 | -1.9613E-02 | 1.0000E+00 | 1.6130E-02 |
| 9.7664E-02  |   | 0.0000E+00 |            |             |             |            |            |
| 3           | 1 | 5.2013E+00 | 5.1906E+00 | 1.0710E-02  | 2.0591E-01  | 1.0000E+00 | 2.4510E-02 |
| 9.7664E-02  |   | 0.0000E+00 |            |             |             |            |            |
| 4           | 1 | 5.1283E+00 | 5.1314E+00 | -3.1276E-03 | -6.0987E-02 | 1.0000E+00 | 3.2890E-02 |
| 9.7664E-02  |   | 0.0000E+00 |            |             |             |            |            |
| 5           | 1 | 5.0326E+00 | 5.0236E+00 | 9.0141E-03  | 1.7911E-01  | 1.0000E+00 | 4.9400E-02 |
| 9.7664E-02  |   | 0.0000E+00 |            |             |             |            |            |
| 6           | 1 | 4.9249E+00 | 4.9271E+00 | -2.2011E-03 | -4.4693E-02 | 1.0000E+00 | 6.6170E-02 |
| 9.7664E-02  |   | 0.0000E+00 |            |             |             |            |            |
| 7           | 1 | 4.8019E+00 | 4.7782E+00 | 2.3716E-02  | 4.9389E-01  | 1.0000E+00 | 9.9190E-02 |
| 9.7664E-02  |   | 0.0000E+00 |            |             |             |            |            |
| 8           | 1 | 4.7221E+00 | 4.7222E+00 | -6.1989E-05 | -1.3127E-03 | 1.0000E+00 | 1.1557E-01 |
| 9.7664E-02  |   | 0.0000E+00 |            |             |             |            |            |
| 9           | 1 | 4.6503E+00 | 4.6772E+00 | -2.6946E-02 | -5.7945E-01 | 1.0000E+00 | 1.3157E-01 |
| 9.7664E-02  |   | 0.0000E+00 |            |             |             |            |            |
| 10          | 1 | 4.5966E+00 | 4.6096E+00 | -1.2972E-02 | -2.8222E-01 | 1.0000E+00 | 1.6396E-01 |
| 9.7664E-02  |   | 0.0000E+00 |            |             |             |            |            |
| 11          | 1 | 4.5683E+00 | 4.5537E+00 | 1.4612E-02  | 3.1985E-01  | 1.0000E+00 | 2.0498E-01 |
| 9.7664E-02  |   | 0.0000E+00 |            |             |             |            |            |

TOLERANCE ON SUM OF SQUARES 0.0300  
 TOLERANCE ON EIGEN VALUES 0.0001  
 CONVERGANCE AFTER 2 ITERATIONS

## 2. ES(-) mass spectra for [4F]<sup>-</sup>

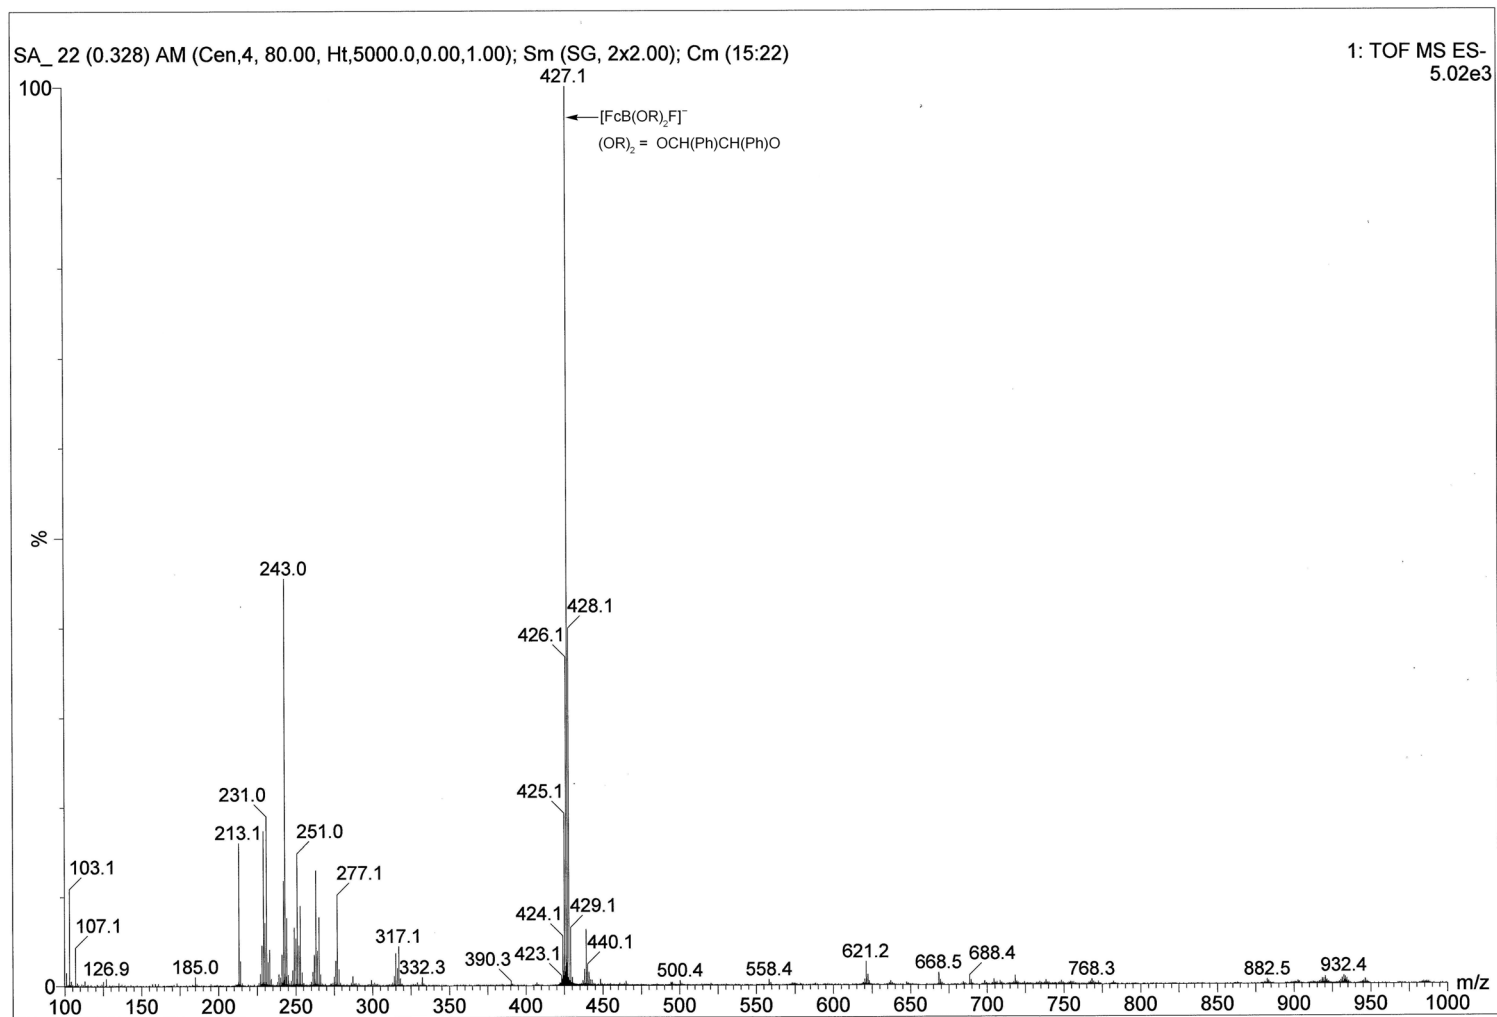

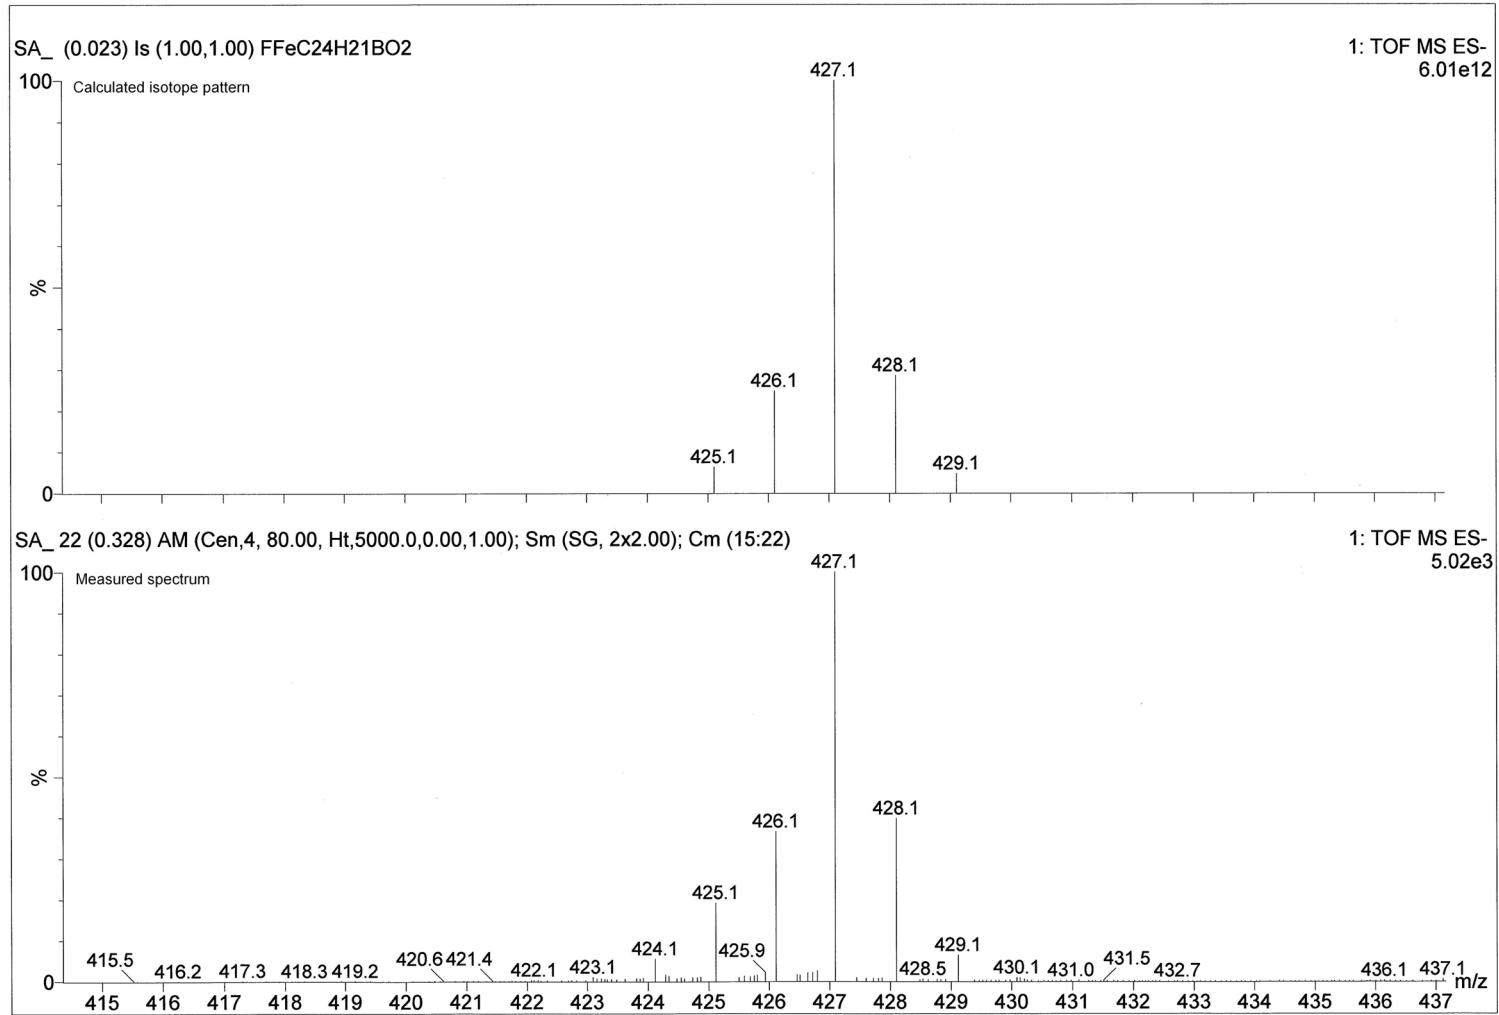

3. Cyclic voltametry traces for (FcB)<sub>2</sub>calix (6)

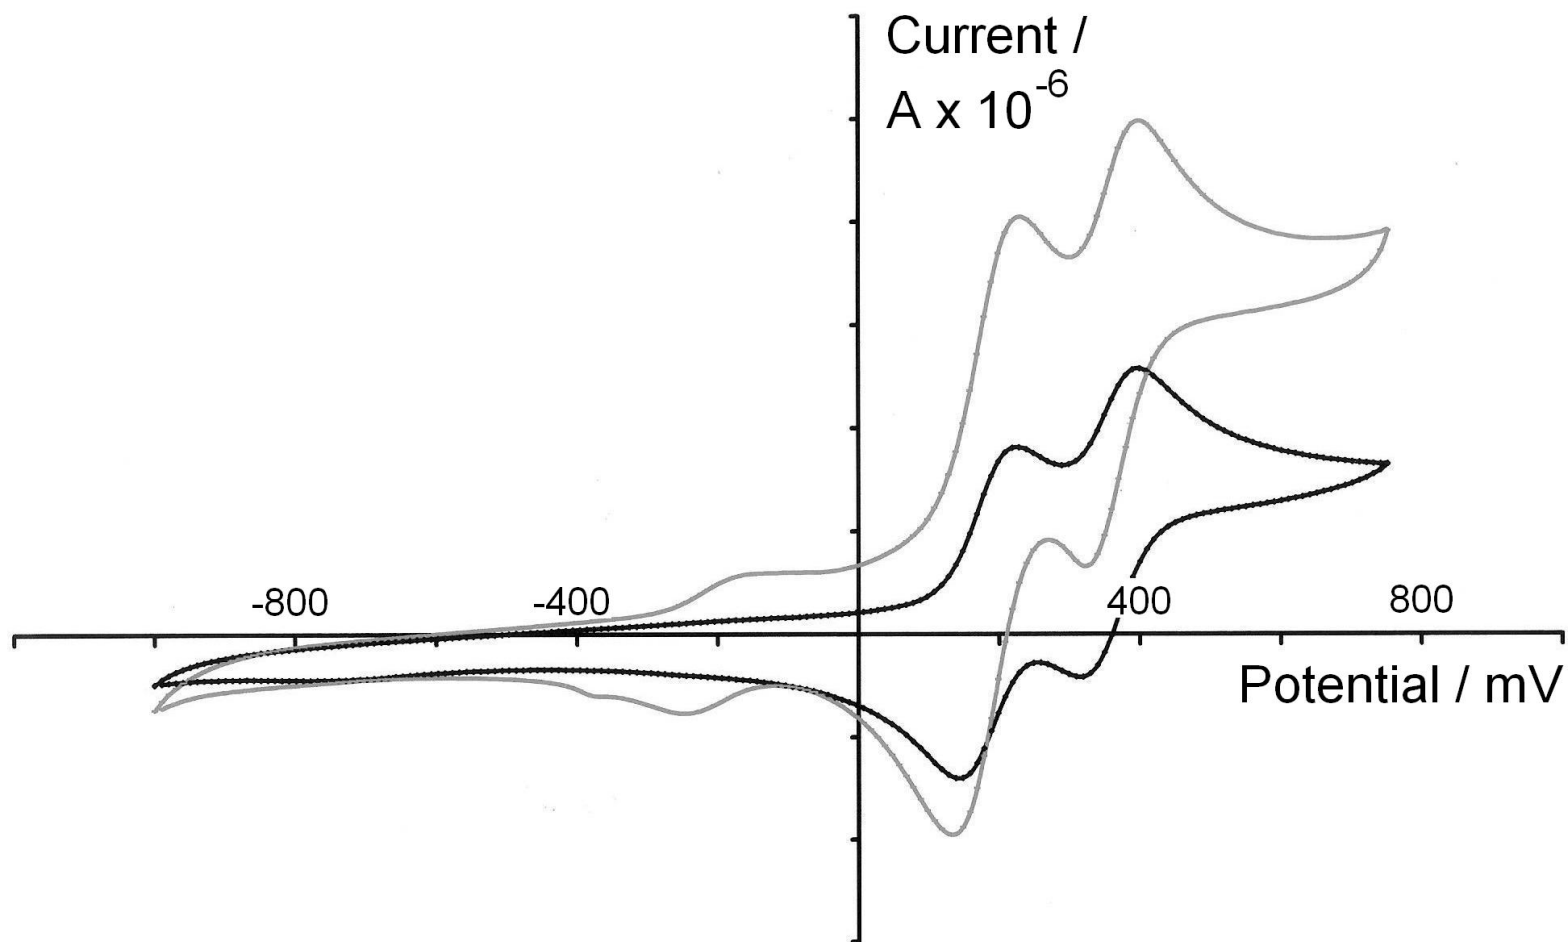

Black: CV for 6; grey: CV for 6 plus trace fluoride.

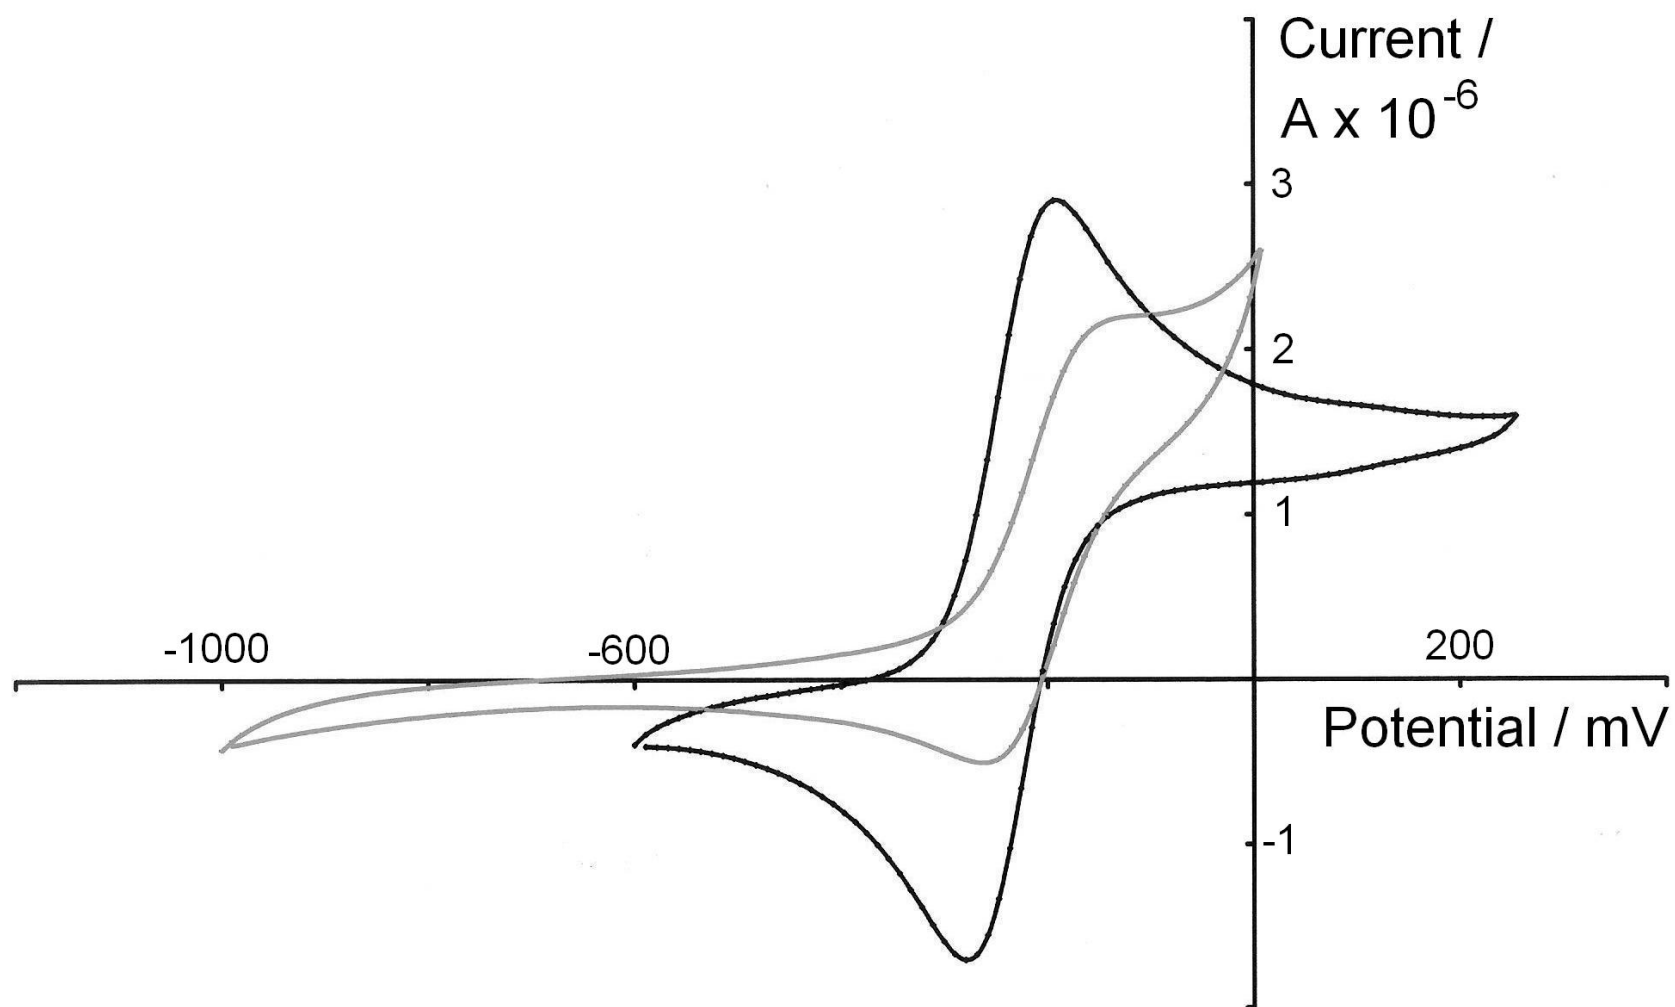

Black: CV for [FcBF<sub>3</sub>]; grey: CV for **6** plus excess fluoride.

4.  $^1\text{H}$  NMR spectra for the reaction of  $(\text{PhB})_2\text{calix}$  (**8**) with  $[\text{nBu}_4\text{N}]\text{F}\cdot x\text{H}_2\text{O}$

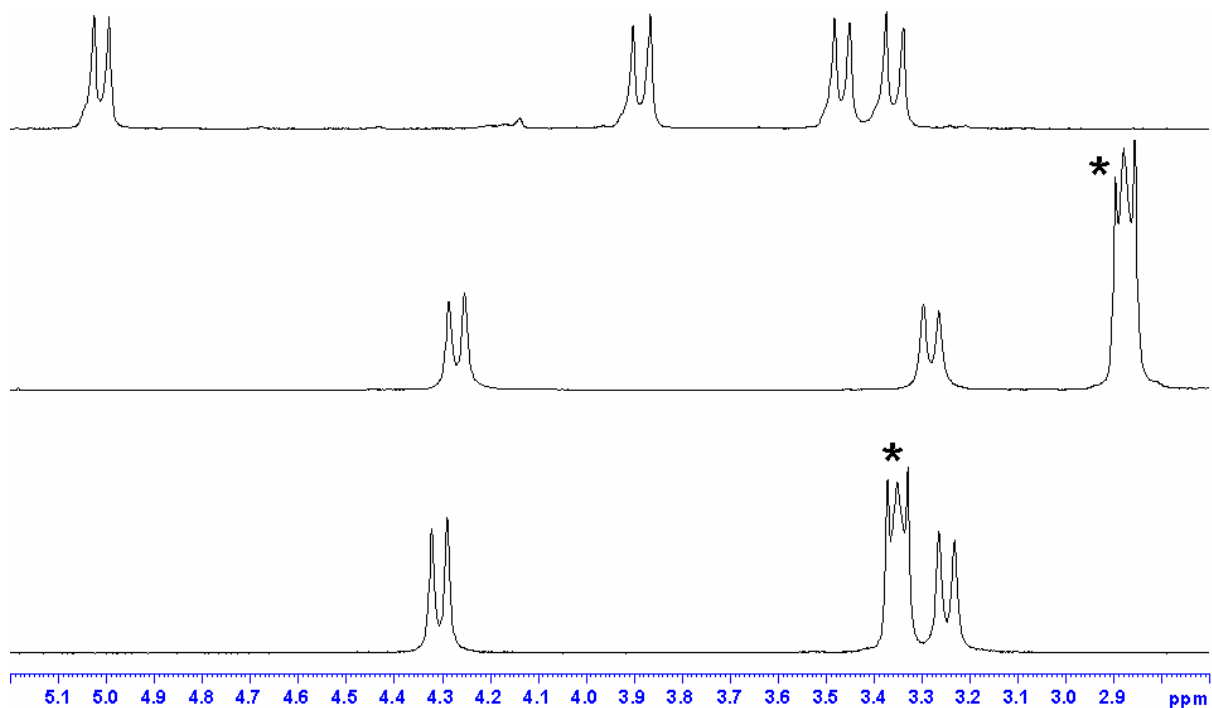

Top:  $(\text{PhB})_2\text{calix}$  (**8**) in  $\text{CDCl}_3$

Middle:  $(\text{PhB})_2\text{calix}$  (**8**) plus excess  $[\text{nBu}_4\text{N}]\text{F}\cdot x\text{H}_2\text{O}$  in  $\text{CDCl}_3$

Bottom:  $\text{H}_4(\text{calix})$  plus excess  $[\text{nBu}_4\text{N}]\text{F}\cdot x\text{H}_2\text{O}$  in  $\text{CDCl}_3$

The resonance indicated with the asterisk is due to the  $\text{NCH}_2$  protons of the  $[\text{nBu}_4\text{N}]^+$  counter-ion and is strongly dependent on concentration and ionic strength.



**$^1\text{H}$  NMR spectra for the reaction of  $(\text{PhB})_2\text{calix}$  (**8**) with water**

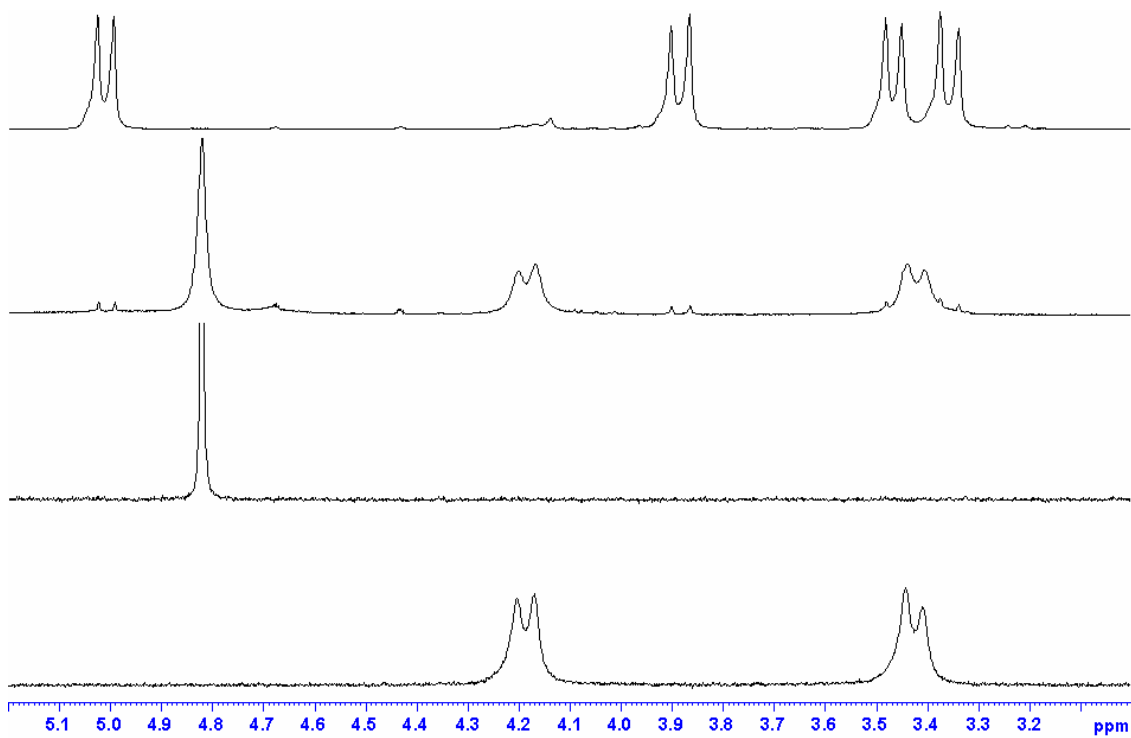

Top:  $(\text{PhB})_2\text{calix}$  (**8**) in  $\text{CDCl}_3$

Top Middle:  $(\text{PhB})_2\text{calix}$  (**8**) plus excess water in  $\text{CDCl}_3$

Bottom Middle:  $\text{PhB}(\text{OH})_2$  in  $\text{CDCl}_3$

Bottom:  $\text{H}_4(\text{calix})$  in  $\text{CDCl}_3$

## 5. Crystallographic data for $\text{FcBO}_2\text{C}_2\text{H}_4$ (**3a**)

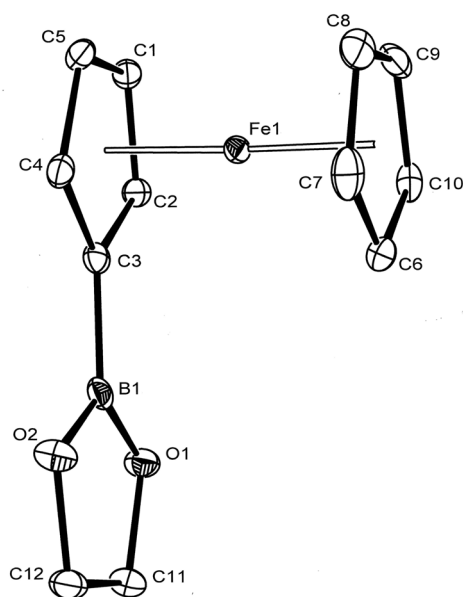

Crystal data and structure refinement for **3a**:

|                                                     |                                                             |                     |
|-----------------------------------------------------|-------------------------------------------------------------|---------------------|
| Empirical formula                                   | C <sub>12</sub> H <sub>13</sub> B Fe O <sub>2</sub>         |                     |
| Formula weight                                      | 255.88                                                      |                     |
| Temperature                                         | 150(2) K                                                    |                     |
| Wavelength                                          | 0.71073 Å                                                   |                     |
| Crystal system                                      | Orthorhombic                                                |                     |
| Space group                                         | <i>p</i> 21 21 21                                           |                     |
| Unit cell dimensions                                | <i>a</i> = 5.81790(10) Å                                    | $\alpha = 90^\circ$ |
|                                                     | <i>b</i> = 9.9233(2) Å                                      | $\beta = 90^\circ$  |
|                                                     | <i>c</i> = 18.4741(5) Å                                     | $\gamma = 90^\circ$ |
| Volume                                              | 1066.56(4) Å <sup>3</sup>                                   |                     |
| <i>Z</i>                                            | 4                                                           |                     |
| Density (calculated)                                | 1.594 Mg/m <sup>3</sup>                                     |                     |
| Absorption coefficient                              | 1.391 mm <sup>-1</sup>                                      |                     |
| <i>F</i> (000)                                      | 528                                                         |                     |
| Crystal size                                        | 0.60 x 0.25 x 0.20 mm <sup>3</sup>                          |                     |
| Theta range for data collection                     | 3.67 to 26.36°                                              |                     |
| Index ranges                                        | -5 ≤ <i>h</i> ≤ 7, -12 ≤ <i>k</i> ≤ 12, -23 ≤ <i>l</i> ≤ 23 |                     |
| Reflections collected                               | 8431                                                        |                     |
| Independent reflections                             | 2138 [ <i>R</i> (int) = 0.0670]                             |                     |
| Completeness to theta = 26.36°                      | 99.7 %                                                      |                     |
| Absorption correction                               | Semi-empirical from equivalents                             |                     |
| Max. and min. transmission                          | 0.7684 and 0.4892                                           |                     |
| Refinement method                                   | Full-matrix least-squares on <i>F</i> <sup>2</sup>          |                     |
| Data / restraints / parameters                      | 2138 / 0 / 145                                              |                     |
| Goodness-of-fit on <i>F</i> <sup>2</sup>            | 1.029                                                       |                     |
| Final <i>R</i> indices [ <i>I</i> > 2σ( <i>I</i> )] | <i>R</i> 1 = 0.0328, <i>wR</i> 2 = 0.0795                   |                     |
| <i>R</i> indices (all data)                         | <i>R</i> 1 = 0.0347, <i>wR</i> 2 = 0.0812                   |                     |
| Absolute structure parameter                        | 0.03(2)                                                     |                     |
| Largest diff. peak and hole                         | 0.332 and -0.681 e.Å <sup>-3</sup>                          |                     |

## 6. Crystallographic data for $\text{fc}(\text{BO}_2\text{C}_2\text{H}_4)_2$ (**3b**)

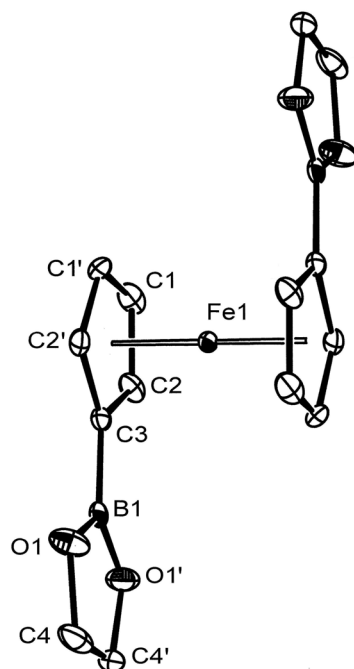

Crystal data and structure refinement for **3b**:

|                                   |                                                                  |                  |
|-----------------------------------|------------------------------------------------------------------|------------------|
| Empirical formula                 | C <sub>14</sub> H <sub>16</sub> B <sub>2</sub> Fe O <sub>4</sub> |                  |
| Formula weight                    | 325.74                                                           |                  |
| Temperature                       | 150(2) K                                                         |                  |
| Wavelength                        | 0.71073 Å                                                        |                  |
| Crystal system                    | Monoclinic                                                       |                  |
| Space group                       | C 2/m                                                            |                  |
| Unit cell dimensions              | a = 7.0116(4) Å                                                  | α = 90°.         |
|                                   | b = 10.0523(7) Å                                                 | β = 104.211(3)°. |
|                                   | c = 9.8912(7) Å                                                  | γ = 90°.         |
| Volume                            | 675.82(8) Å <sup>3</sup>                                         |                  |
| Z                                 | 2                                                                |                  |
| Density (calculated)              | 1.601 Mg/m <sup>3</sup>                                          |                  |
| Absorption coefficient            | 1.126 mm <sup>-1</sup>                                           |                  |
| F(000)                            | 336                                                              |                  |
| Crystal size                      | 0.25 x 0.20 x 0.08 mm <sup>3</sup>                               |                  |
| Theta range for data collection   | 3.62 to 26.33°.                                                  |                  |
| Index ranges                      | -8 ≤ h ≤ 8, -10 ≤ k ≤ 12, -12 ≤ l ≤ 12                           |                  |
| Reflections collected             | 1901                                                             |                  |
| Independent reflections           | 740 [R(int) = 0.0634]                                            |                  |
| Completeness to theta = 26.33°    | 99.7 %                                                           |                  |
| Absorption correction             | Semi-empirical from equivalents                                  |                  |
| Max. and min. transmission        | 0.9153 and 0.7661                                                |                  |
| Refinement method                 | Full-matrix least-squares on F <sup>2</sup>                      |                  |
| Data / restraints / parameters    | 740 / 0 / 53                                                     |                  |
| Goodness-of-fit on F <sup>2</sup> | 1.097                                                            |                  |
| Final R indices [I > 2σ(I)]       | R1 = 0.0449, wR2 = 0.0934                                        |                  |
| R indices (all data)              | R1 = 0.0535, wR2 = 0.0966                                        |                  |
| Largest diff. peak and hole       | 0.606 and -0.547 e.Å <sup>-3</sup>                               |                  |

## 7. Crystallographic data for fcB<sub>2</sub>calix (7)

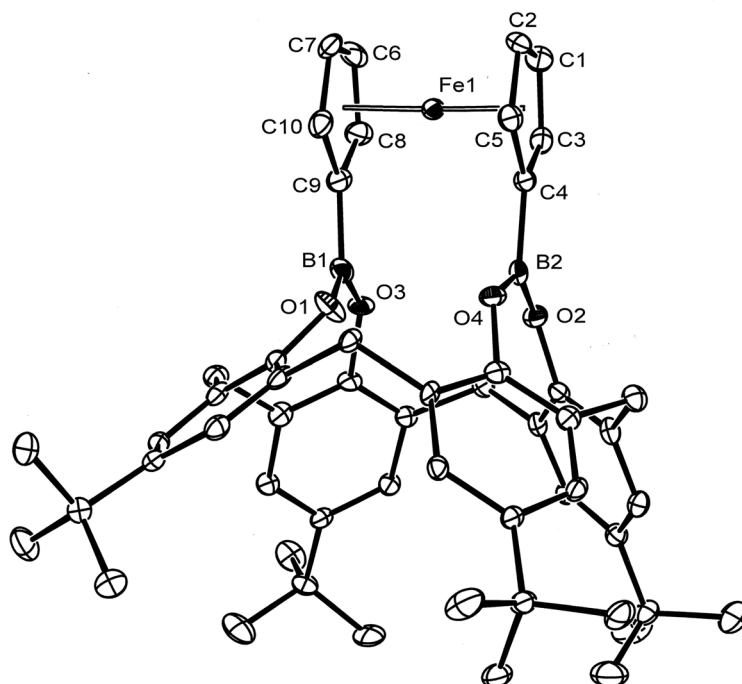

Table 1. Crystal data and structure refinement for 7:

|                                   |                                                                  |                   |
|-----------------------------------|------------------------------------------------------------------|-------------------|
| Empirical formula                 | C <sub>57</sub> H <sub>67</sub> B <sub>2</sub> Fe O <sub>4</sub> |                   |
| Formula weight                    | 893.58                                                           |                   |
| Temperature                       | 150(2) K                                                         |                   |
| Wavelength                        | 0.71073 Å                                                        |                   |
| Crystal system                    | Triclinic                                                        |                   |
| Space group                       | P -1                                                             |                   |
| Unit cell dimensions              | a = 10.7685(3) Å                                                 | α = 89.514(2)°.   |
|                                   | b = 12.7505(4) Å                                                 | β = 73.968(2)°.   |
|                                   | c = 19.0095(6) Å                                                 | γ = 76.0250(10)°. |
| Volume                            | 2429.57(13) Å <sup>3</sup>                                       |                   |
| Z                                 | 2                                                                |                   |
| Density (calculated)              | 1.221 Mg/m <sup>3</sup>                                          |                   |
| Absorption coefficient            | 0.356 mm <sup>-1</sup>                                           |                   |
| F(000)                            | 954                                                              |                   |
| Crystal size                      | 0.38 x 0.20 x 0.13 mm <sup>3</sup>                               |                   |
| Theta range for data collection   | 2.74 to 27.21°.                                                  |                   |
| Index ranges                      | -13 ≤ h ≤ 13, -16 ≤ k ≤ 16, -23 ≤ l ≤ 24                         |                   |
| Reflections collected             | 37381                                                            |                   |
| Independent reflections           | 10716 [R(int) = 0.3243]                                          |                   |
| Completeness to theta = 27.21°    | 98.7 %                                                           |                   |
| Absorption correction             | Semi-empirical from equivalents                                  |                   |
| Max. and min. transmission        | 0.9551 and 0.8764                                                |                   |
| Refinement method                 | Full-matrix least-squares on F <sup>2</sup>                      |                   |
| Data / restraints / parameters    | 10716 / 6 / 587                                                  |                   |
| Goodness-of-fit on F <sup>2</sup> | 1.025                                                            |                   |
| Final R indices [I > 2σ(I)]       | R1 = 0.1237, wR2 = 0.3054                                        |                   |
| R indices (all data)              | R1 = 0.1874, wR2 = 0.3554                                        |                   |
| Extinction coefficient            | 0.017(4)                                                         |                   |
| Largest diff. peak and hole       | 2.075 and -2.014 e.Å <sup>-3</sup>                               |                   |
